# Supplementary material for: Probabilistic Optimal Active and Reactive Power Dispatch including Load and Wind Uncertainties considering Correlation
Source: Hindawi journal article supplement (doi:10.1155/2023/2759073), 2023-05-30
Supplement: f1 [file 2759073.f1.docx]

**Appendices**

**Appendix-A**

Appendix A presented the Gram-Charlier type-A series description which is utilized in this work. The expansion of this series is utilized for the computation of probability distribution function (PDF) and cumulative distribution function (CDF).

*Gram-Charlier type-A series*

Consider a random variable *τ* which follows a continuous distribution having mean *µ* and standard deviation *σ*. When *τ* is standardized as *x*=( *τ* -*µ*)/(*σ*), then its cumulative and density functions are denoted by *F*(*x*) and *f*(*x*), respectively. Then according to Gram-Charlier expansion [4], *F*(*x*) and *f*(*x*) can be expressed as

(36)

(37)

where *φ(x)* and Ф*(x)* represents PDF and CDF of the standard normal distribution (µ=0,σ=1), *λ3,x* and *λ4,x* represent skewness and kurtosis.

(38)

where *E*[ ] indicates mean operator.

**Appendix-B**

In Appendix B, Table B1 is utilized for providing the parameters of the induction generator type wind generator.

Table B1: Parameters of *IG*-type wind generator

| Rating = 0.5 MW | *Xl1* = 0.08212 p.u |
| --- | --- |
| Rated KV = 0.69 | *Xl2* = 0.107225 p.u |
| *R1* = 0.005986 p.u | *Xm* = 2.5561 p.u |
| *R2* = 0.0169 p.u | *XC* = 2.5561 p.u |
| ***cosϕ*** = 0.8 lag | |

Furthermore, in appendix B table B2 is utilized for showing the diagonal and off-diagonal elements of the load correlation matrix for IEEE 9 bus system, utilized in this work.

Table B2: Load correlation matrix for IEEE-9 bus system

| ***Load*** | *PD5* | *PD7* | *PD9* | *QD5* | *QD7* | *QD9* |
| --- | --- | --- | --- | --- | --- | --- |
| *PD5* | 1 | 0.3 | 0.2 | 0.45 | 0.1 | 0.1 |
| *PD7* | 0.3 | 1 | 0.23 | 0.1 | 0.45 | 0.1 |
| *PD9* | 0.2 | 0.23 | 1 | 0.1 | 0.1 | 0.45 |
| *QD5* | 0.45 | 0.1 | 0.1 | 1 | 0.3 | 0.2 |
| *QD7* | 0.1 | 0.45 | 0.1 | 0.3 | 1 | 0.3 |
| *QD9* | 0.1 | 0.1 | 0.45 | 0.2 | 0.3 | 1 |

Moreover, in appendix B table B3 is utilized for showing the diagonal and off-diagonal elements of the load correlation matrix for IEEE 30 bus system, utilized in this work.

Table B3: Load correlation matrix for IEEE-30 bus system

| ***Load*** | *PD19* | *PD21* | *PD30* | *QD19* | *QD21* | *QD30* |
| --- | --- | --- | --- | --- | --- | --- |
| *PD19* | 1 | 0.2 | 0.2 | 0.5 | 0.15 | 0 |
| *PD21* | 0.2 | 1 | 0.3 | 0.15 | 0.5 | 0 |
| *PD30* | 0.2 | 0.3 | 1 | 0 | 0 | 0.5 |
| *QD19* | 0.5 | 0.15 | 0 | 1 | 0.22 | 0.1 |
| *QD21* | 0.15 | 0.5 | 0 | 0.22 | 1 | 0.15 |
| *QD30* | 0 | 0 | 0.5 | 0.1 | 0.15 | 1 |
